# Supplementary material for: Aggregation-prone Tau impairs mitochondrial import, which affects organelle morphology and neuronal complexity
Source: PubMed Central journal article supplement (PMC10357015; doi:10.1242/jcs.260993), 2023-07-07
Supplement: joces-136-260993-s1.pdf [file joces-136-260993-s1.pdf]

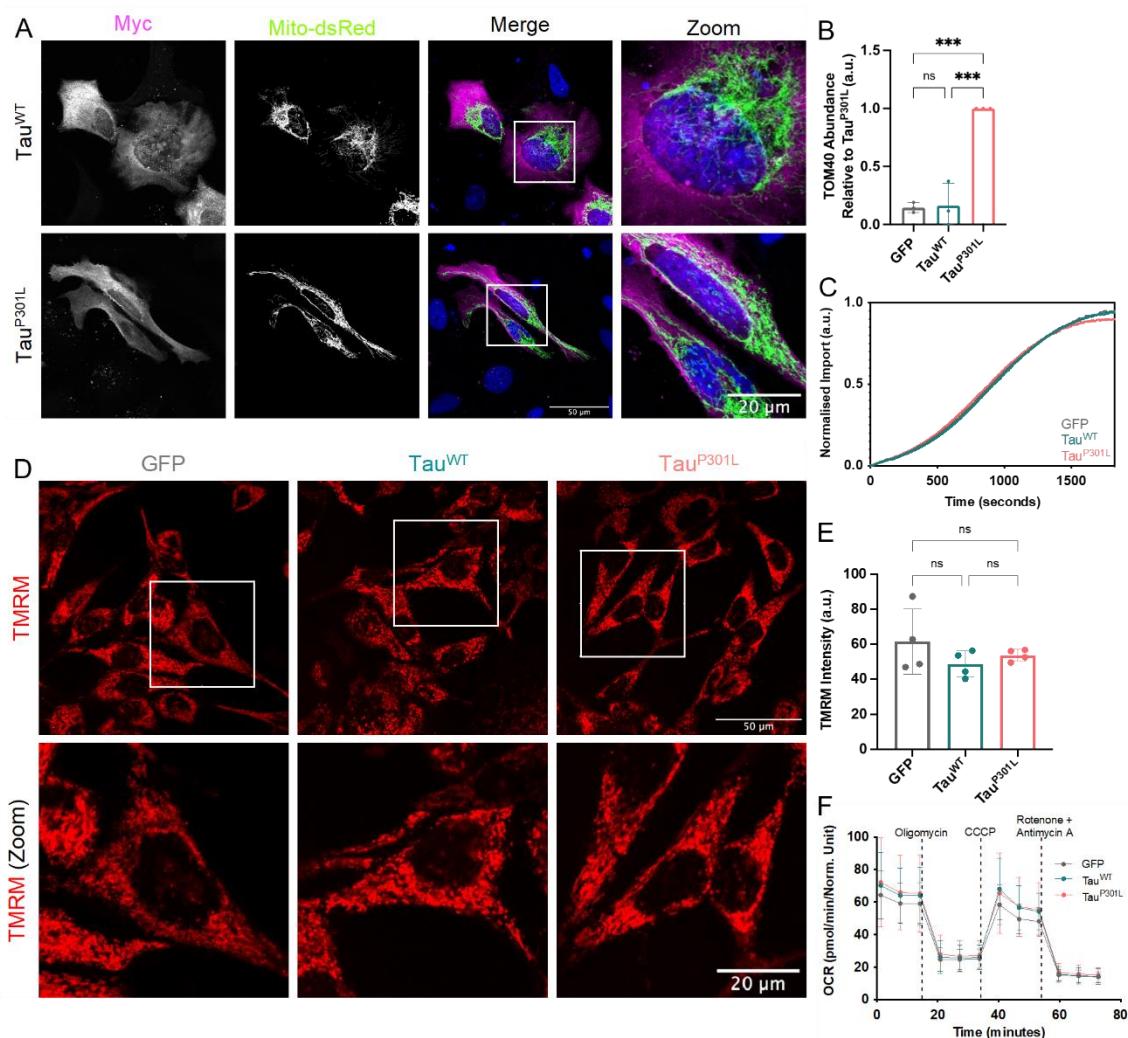

**Fig. S1. (A)** Representative confocal images showing mitochondria within HeLaGAL cells subjected to the over-production of mito-dsRed (green; to indicate mitochondrial localisation) and Myc-Tau<sup>WT</sup> or Myc-Tau<sup>P301L</sup> for 48 h. Cells were fixed and stained against Myc (CST 9B11; magenta; 1:1000) to indicate Tau localisation, and DAPI (blue; nuclei). N=4 biological replicates. **(B)** Quantification of the immunoprecipitation data in Fig. 1D, showing the abundance of TOM40 in the pulldown elution after immunoprecipitation of Myc-GFP, Myc-Tau<sup>WT</sup>, or Myc-Tau<sup>P301L</sup> from the mitochondrial fraction of HeLaGAL cells. The relative abundance was obtained by normalising levels in the GFP and Tau<sup>WT</sup> samples to levels in the Tau<sup>P301L</sup> sample. N=3 biological replicates. One-way ANOVA and Tukey's *post hoc* test were used to determine significance. Error bars show SD. P values (L-R, bottom-top): 0.9807, 0.0002, 0.0002. Representative Western blots are shown in Fig. 1D. **(C)** MitoLuc import assay trace showing the import of precursor protein *Su9-EGFP-pep86* in HeLaGAL cells over-producing *Cox8a-11S* and GFP, Tau<sup>WT</sup>, or Tau<sup>P301L</sup>. Averaged,

normalised traces are shown (normalised to eqFP670 expression and max amplitude/run), and error bars represent SD. N=3 biological repeats were performed. This trace corresponds to the quantification of import amplitude shown in Fig. 1E. **(D)** Representative confocal images (left) showing TMRM fluorescence (red) in the mitochondria of HeLaGAL cells over-producing Myc-GFP, Myc-Tau<sup>WT</sup>, or Myc-Tau<sup>P301L</sup>. CCCP was added after 2 min to control for background fluorescence (not shown). N=4 biological replicates. **(E)** TMRM intensity was quantified (right) using a Fiji macro (see Methods). Error bars show the SD. One-way ANOVA and Tukey's *post hoc* test were used to determine significance. P values (L-R, bottom-top): 0.3212, 0.8181, 0.6398. **(F)** Mitochondrial stress test showing the oxygen consumption rate (OCR) of HeLaGAL cells over-producing Myc-GFP, Myc-Tau<sup>WT</sup>, or Myc-Tau<sup>P301L</sup>. Data are normalised to the protein content of each well as determined by SRB assays. Error bars show the SD. N=6 biological replicates, each with 3 technical replicates.

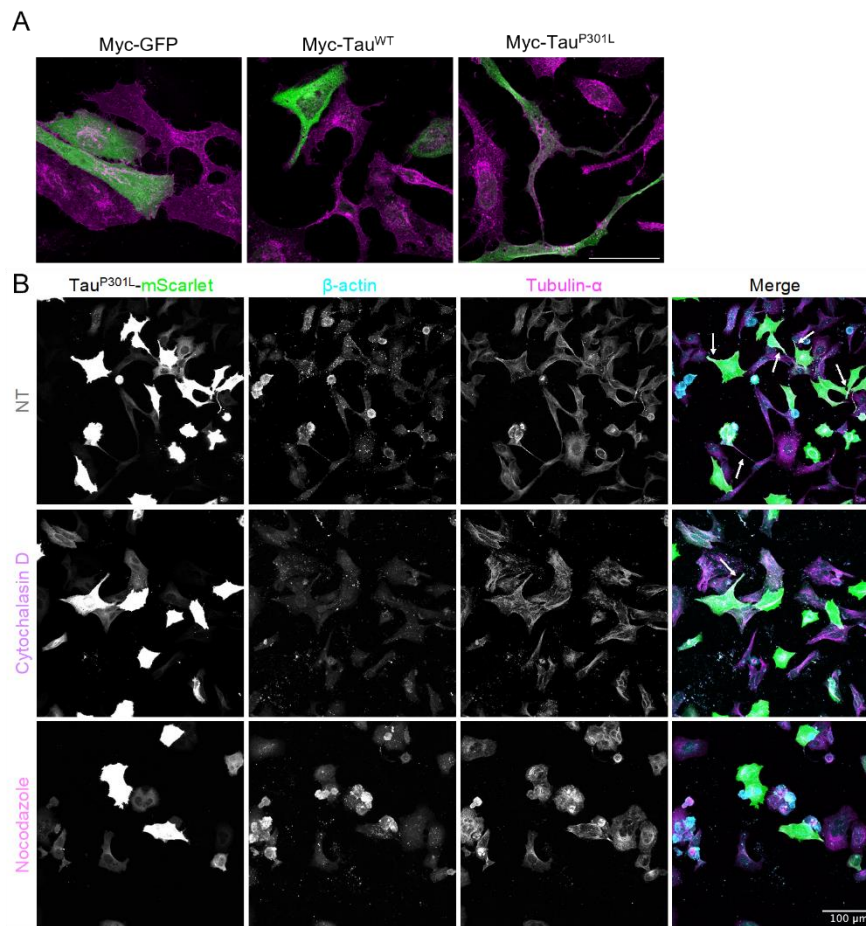

**Fig. S2. (A)** Representative confocal images showing the cell morphology of HeLaGAL cells subjected to over-production of Myc-GFP, Myc-Tau<sup>WT</sup>, or Myc-Tau<sup>P301L</sup> for 48 h. Cells were fixed and stained with Wheat Germ Agglutinin (WGA; magenta), a membrane stain, to highlight TNTs. Co-staining was carried out against Myc (CST 9B11; green; 1:1000) to indicate TNT formation between transfected and untransfected cells. N=4 biological replicates. **(B)** Representative confocal images of HeLaGAL cells exposed to Tau<sup>P301L</sup> over-production in the presence of TNT inhibitors. HeLaGAL cells were subjected to over-production of Tau<sup>P301L</sup>-mScarlet (green) and either untreated (NT; DMSO only) or treated with 50 nM Cytochalasin D or 100 nM Nocodazole (48 h). Cells were fixed and stained for β-actin (cyan; 1:1000) and tubulin-α (magenta; BioRad MCA78G; 1:500). Arrows in merge highlight TNTs. N=3 biological replicates. Quantification is shown in Fig. 2D.

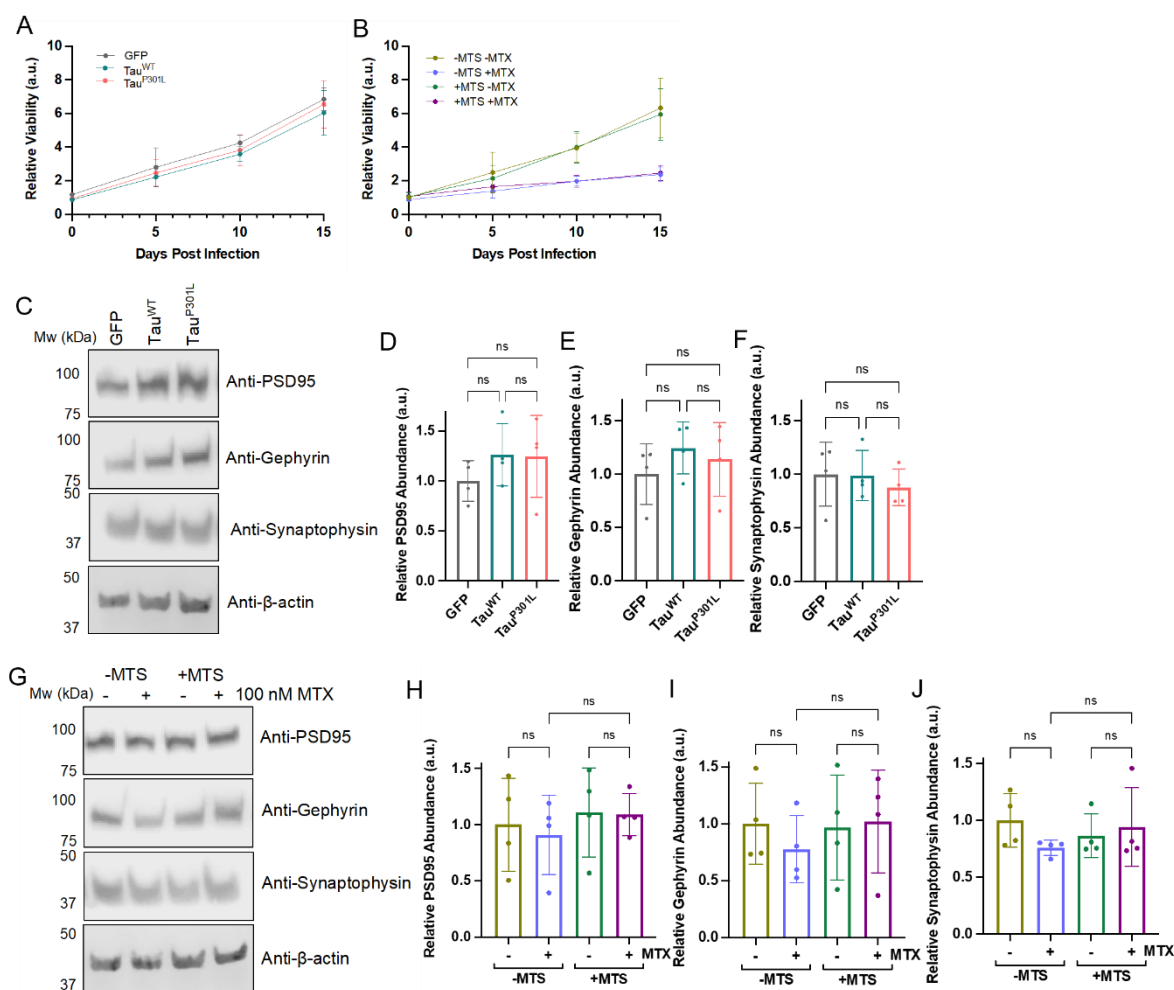

**Fig. S3.** Viability of primary cortical neurons over-producing GFP (control), Tau<sup>WT</sup> or Tau<sup>P301L</sup> (A), or EGFP-DHFR(-MTS) or Su9-EGFP-DHFR (+MTS) +/- 100 nM MTX (B), as determined by cell density, quantified by SRB assays. Data were normalised to the average reading for the 0 days post-infection time point to give relative viability of the neurons in response to the varying expression/treatment. N=4 biological replicates. Error bars show SD. (C) Representative Western blots showing the levels of PSD95 (1:1000), Gephyrin (Synaptic Systems; 147111; 1:1000), and Synaptophysin (Merck Millipore; 573822; 1:1000) in DIV21 cortical neurons after 7 days of over-production of Myc-GFP, Myc-Tau<sup>WT</sup>, or Myc-Tau<sup>P301L</sup>. β-actin was used as a loading control. N=4 biological replicates. Histograms show quantification of PSD95 (D), Gephyrin (E), and Synaptophysin (F) relative abundance, normalised to β-actin and relative to levels in the GFP control sample. Error bars show SD. One-way ANOVA and Tukey's *post hoc* test were used to determine significance. P values (L-R, bottom-top): PSD95: 0.5076, 0.9979, 0.5422; Gephyrin: 0.4992, 0.8688, 0.7917; Synaptophysin: 0.9981, 0.7904, 0.7581. (G) Representative Western blots

showing the levels of PSD95, Gephyrin, and Synaptophysin in DIV21 cortical neurons after 7 days of over-production of EGFP-DHFR (-MTS) or Su9-EGFP-DHFR (+MTS) +/- 100 nM MTX.  $\beta$ -actin was used as a loading control. N=4 biological replicates. Histograms show the quantification of PSD95 (**H**), Gephyrin (**I**), and Synaptophysin (**J**) relative abundance, normalised to  $\beta$ -actin and relative to levels in the -MTS -MTX control sample. Error bars show SD. One-way ANOVA and Tukey's *post hoc* test were used to determine significance. P values (L-R, bottom-top): PSD95: 0.9810, 0.9998, 0.8782; Gephyrin: 0.8560, 0.9974, 0.8216; Synaptophysin: 0.4862, 0.9662, 0.6959.



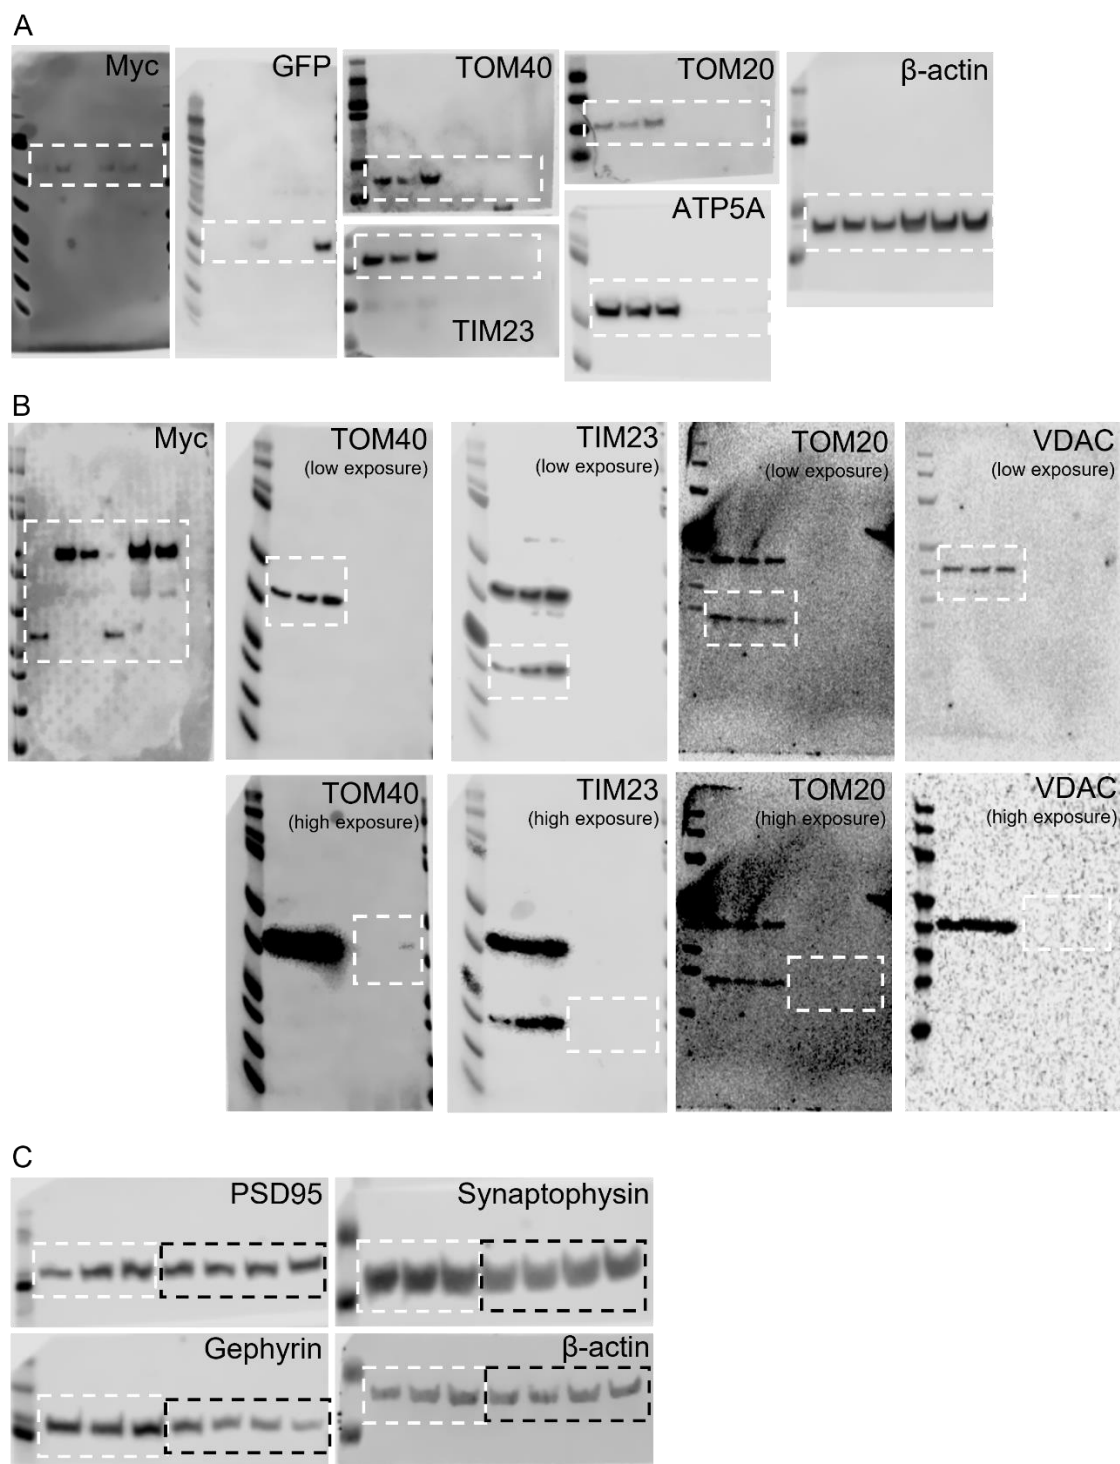

**Fig. S4.** Uncropped representative Western blots from Fig. 1A (A), Fig. 1D (B), and Fig. S3C and G (C). The box shows the area cropped in the main figure. For Western blots in Fig. 1D where multiple exposures were shown in one figure, both exposures have been indicated in (B). Western blots in Fig. S3C and G were performed concurrently on the same membrane, and therefore are shown together; the white box shows the area cropped in Fig. S3C, and the black box shows the area cropped in Fig. S3G.
